# Supplementary material for: Genome-Wide Landscapes of Human Local Adaptation in Asia
Source: PubMed Central journal article supplement (PMC3551950; doi:10.1371/journal.pone.0054224), 2013-01-22

Figure S1. Signature of local adaptation in Philippine Negritos adjacent to *FOXQ1*

A. XP-CLR analysis

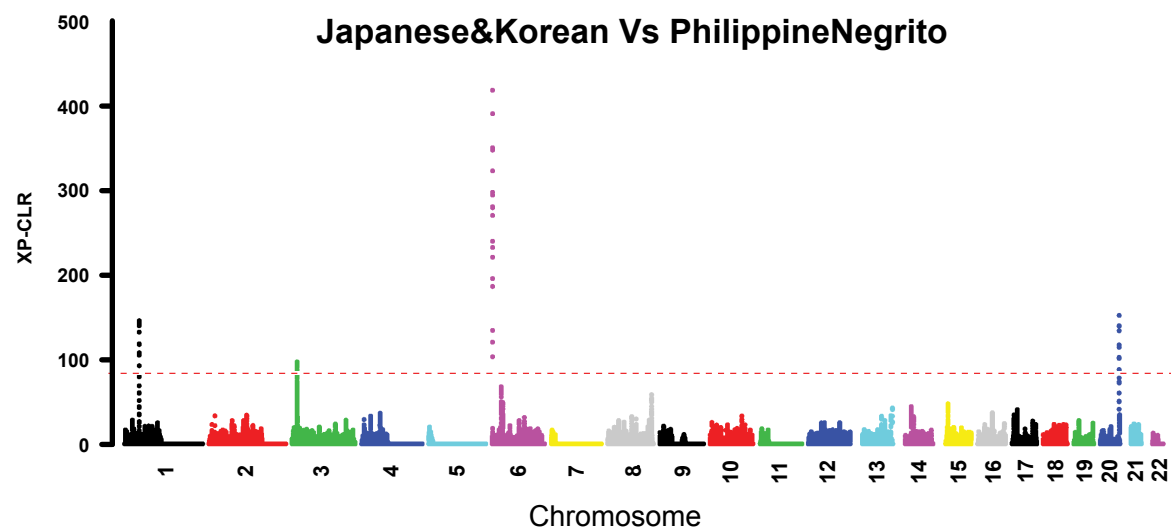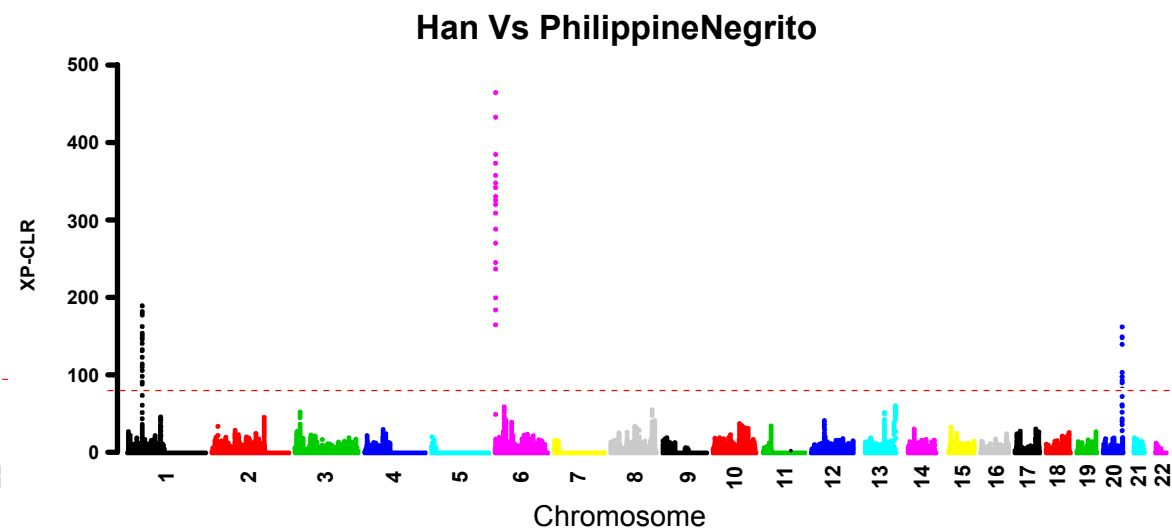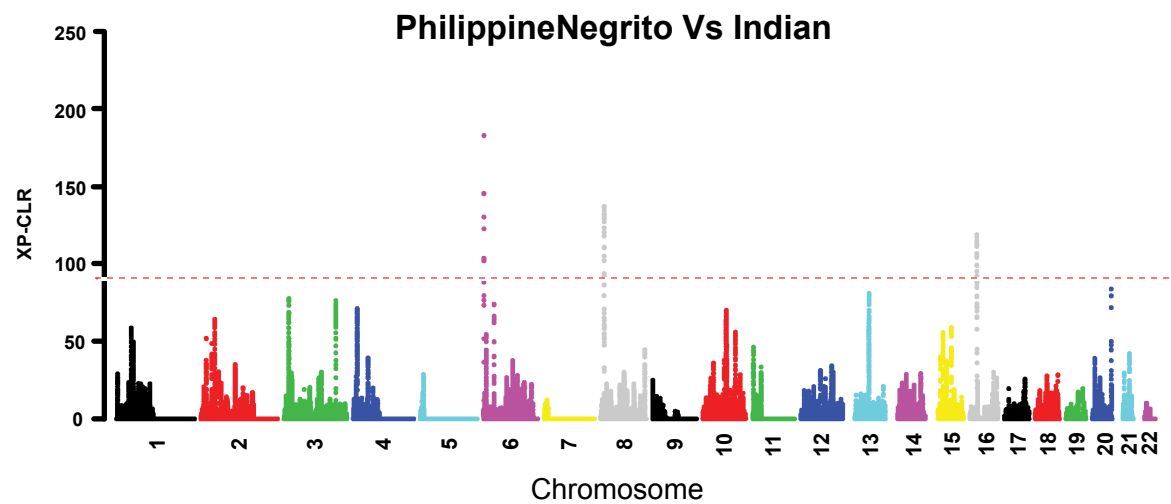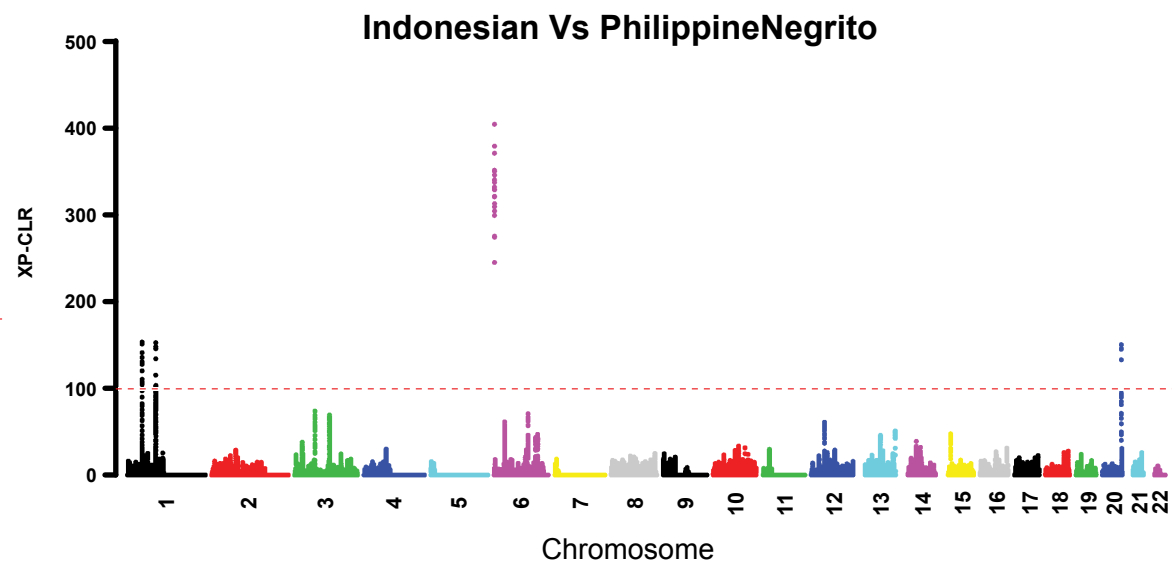

## B. Window-based $F_{ST}$ analysis

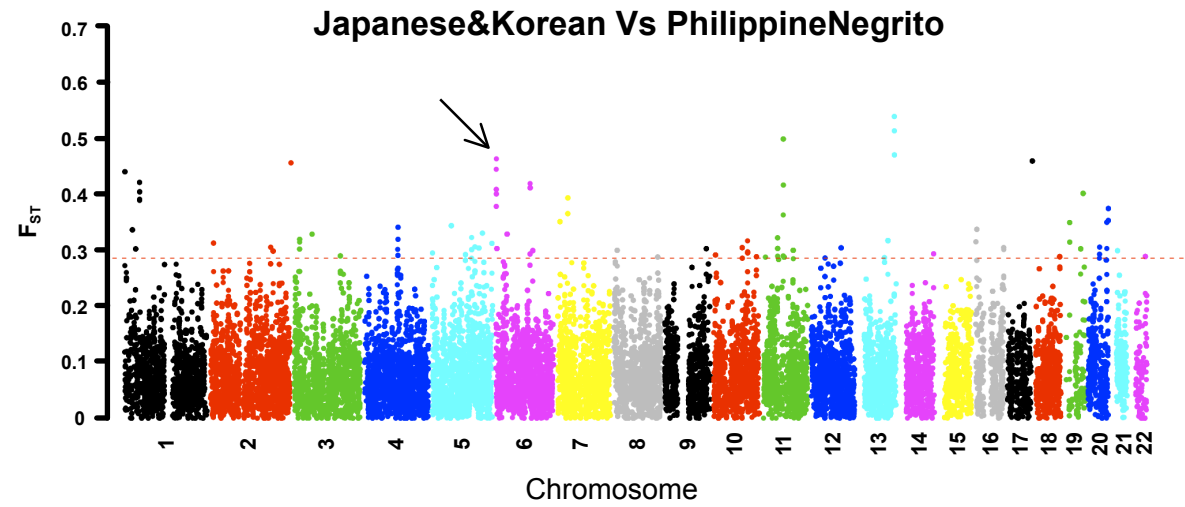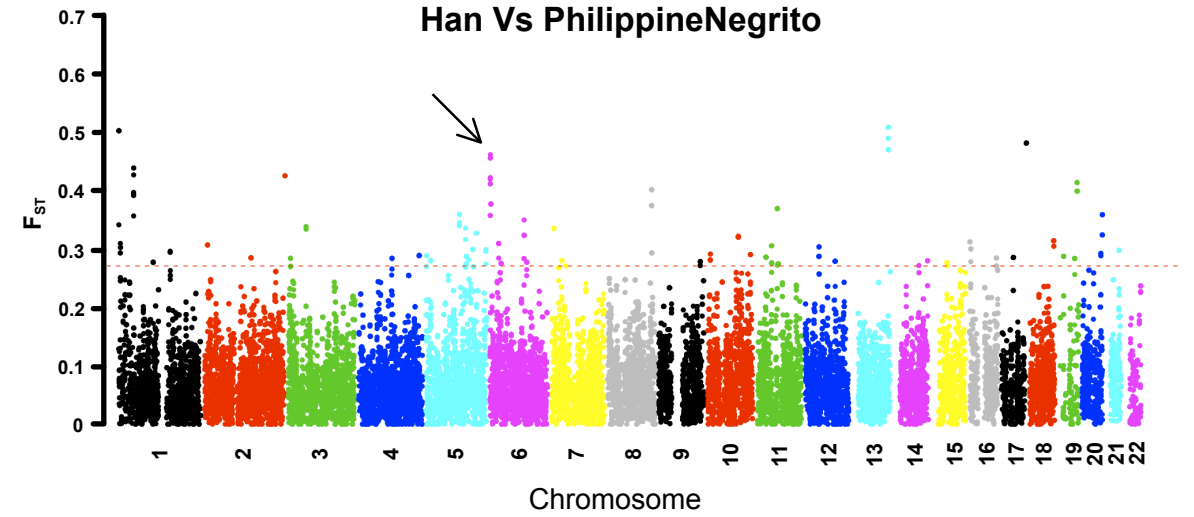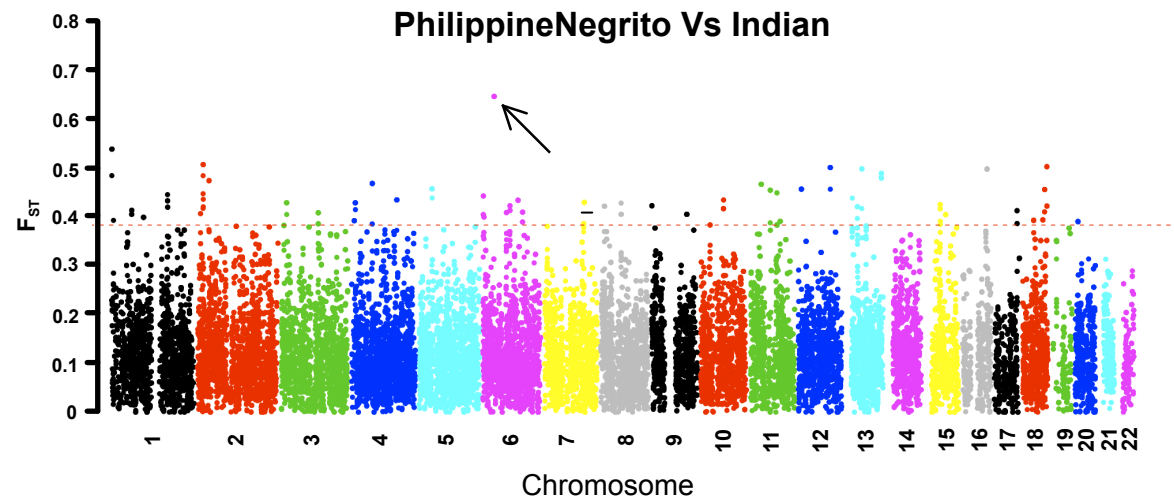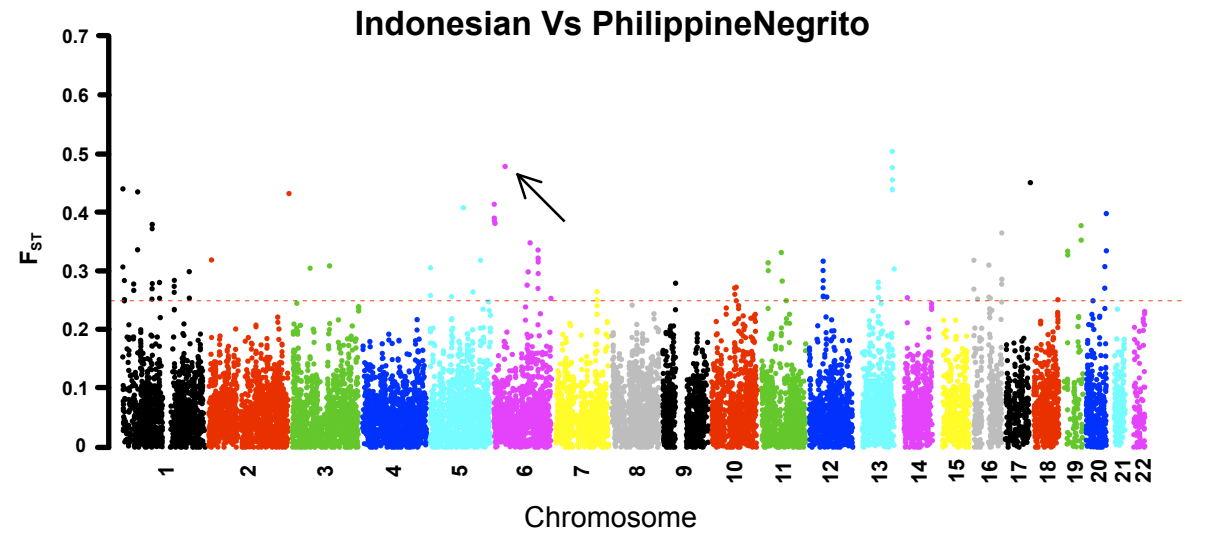

Supplement: pone.0054224.s001.pdf [file pone.0054224.s001.pdf]
