# Supplementary material for: Genome-Wide Landscapes of Human Local Adaptation in Asia
Source: PubMed Central journal article supplement (PMC3551950; doi:10.1371/journal.pone.0054224), 2013-01-22

Figure S2. Signatures of local adaptation in Southeast Asian populations associated with *MTTP* and *DAPP1*

A. Window-based  $F_{ST}$  analysis

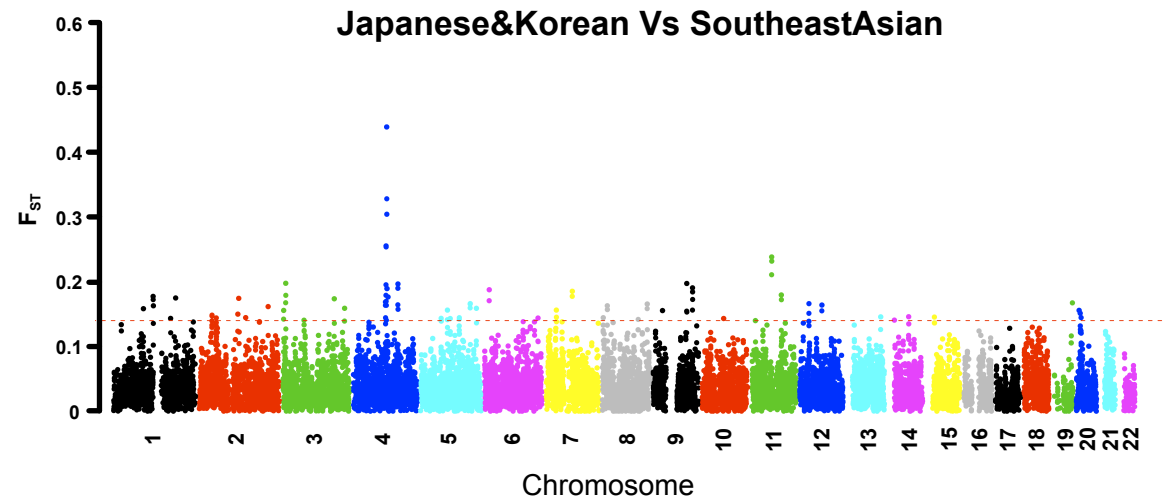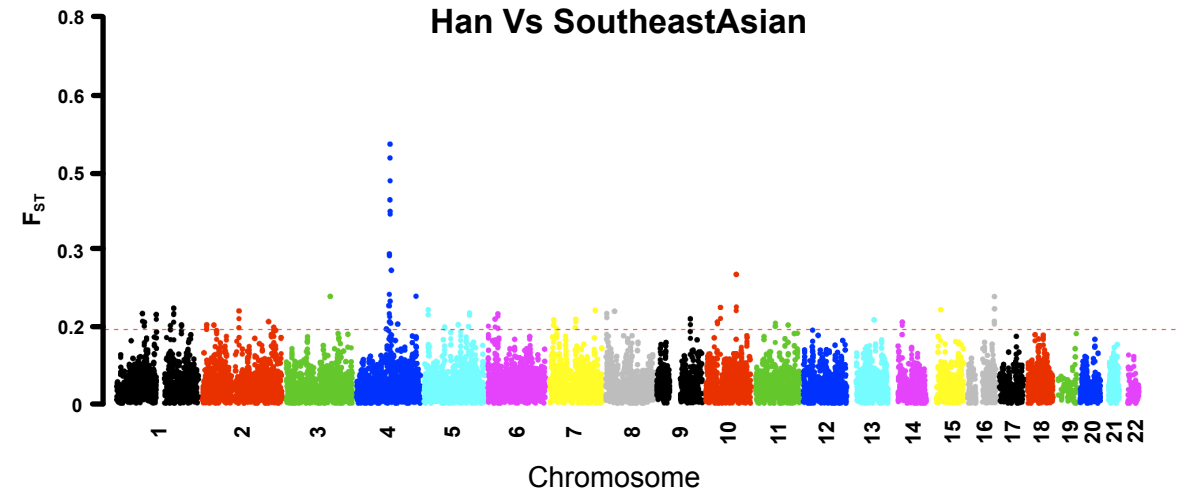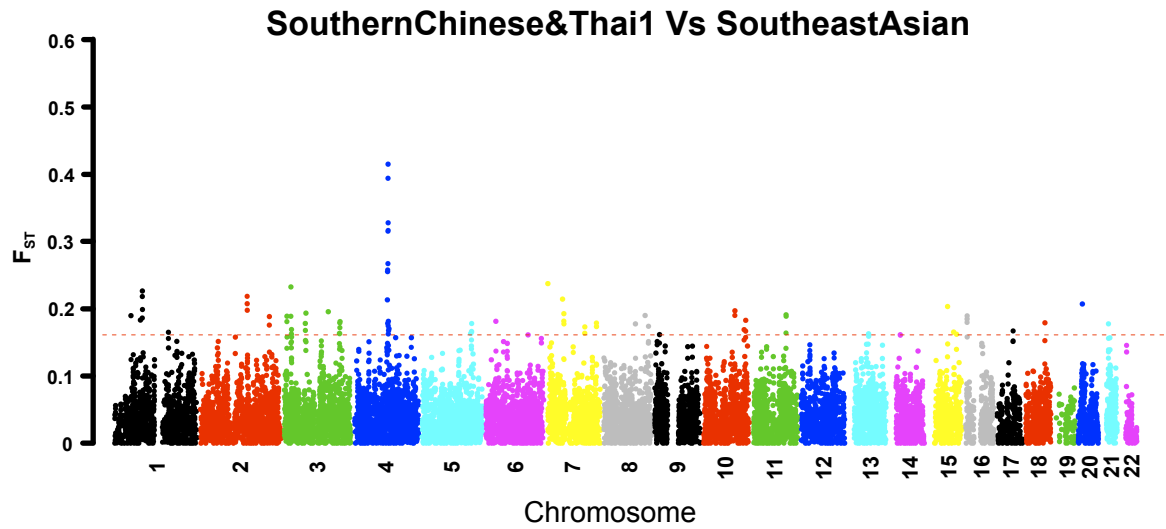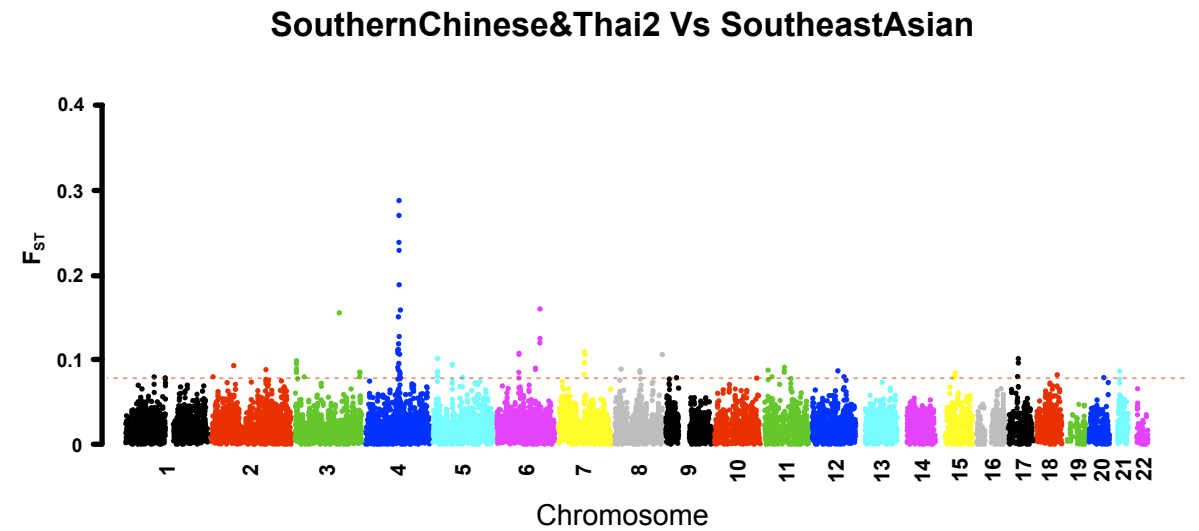

## B. SNP-based $F_{ST}$ analysis

### Japanese&Korean Vs SoutheastAsian

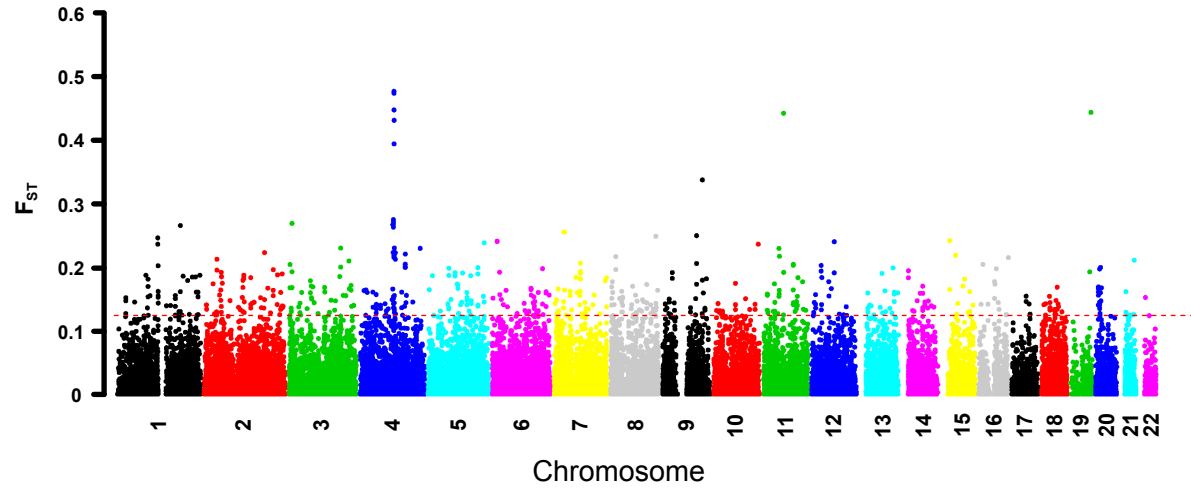

### Han Vs SoutheastAsian

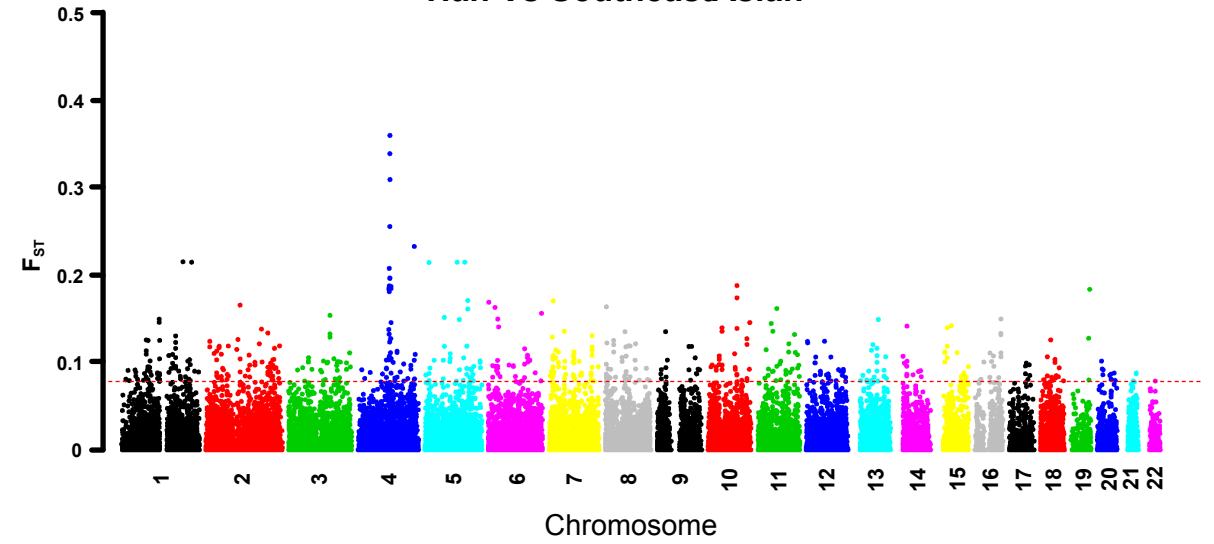

### SouthernChinese&Thai1 Vs SoutheastAsian

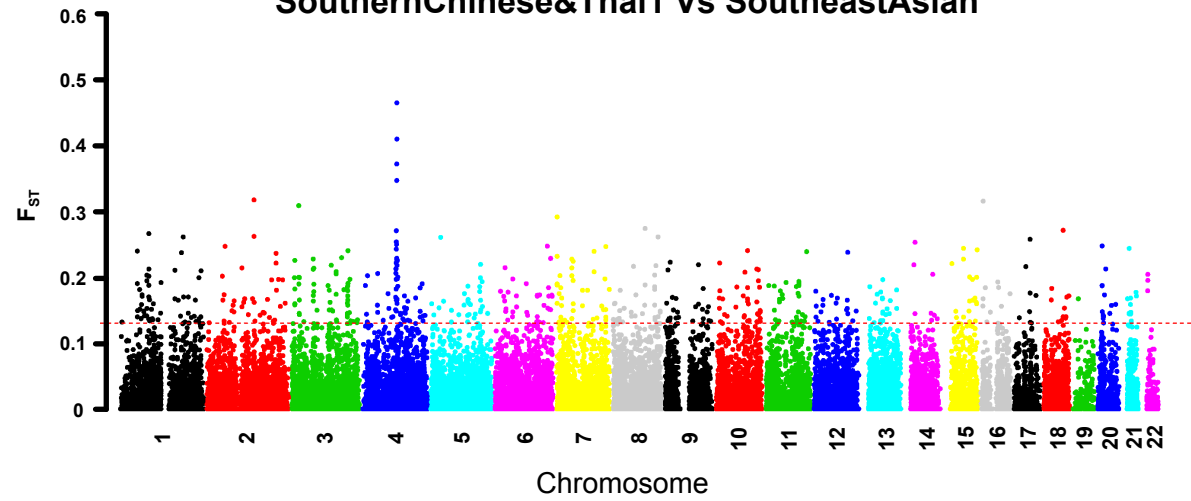

### SouthernChinese&Thai2 Vs SoutheastAsian

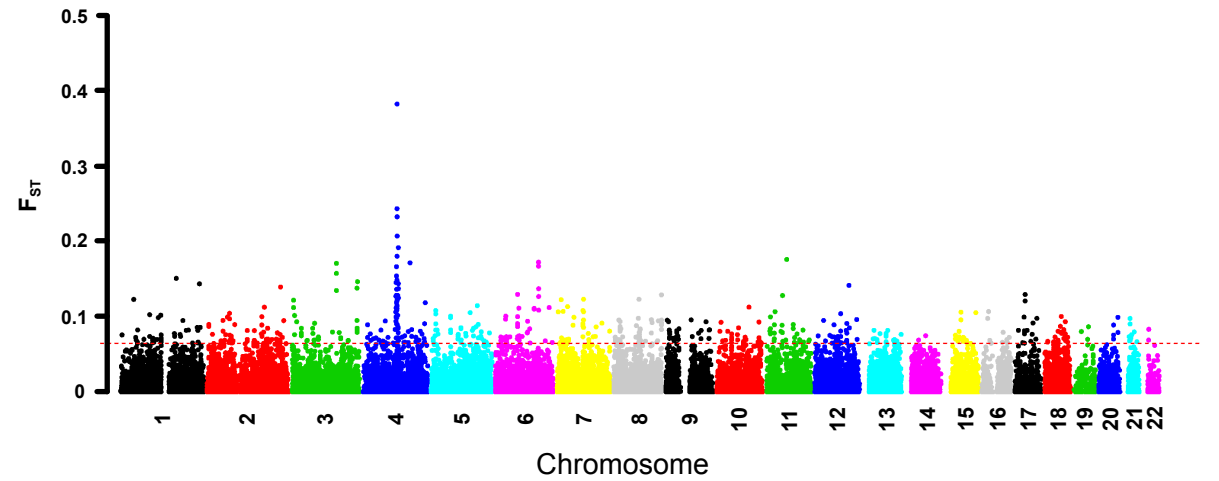

Supplement: pone.0054224.s002.pdf [file pone.0054224.s002.pdf]
