# Supplementary material for: Genome-Wide Landscapes of Human Local Adaptation in Asia
Source: PubMed Central journal article supplement (PMC3551950; doi:10.1371/journal.pone.0054224), 2013-01-22
Supplement: pone.0054224.s003.pdf [file pone.0054224.s003.pdf]

**Table S1 Characterization of datasets and group division**

| Group Name             | ID       | Location     | Latitude | Longitude   | Ethnicity   | size | total |
|------------------------|----------|--------------|----------|-------------|-------------|------|-------|
| Japanese&Korean        | JP-RK    | Japan        | 26.5     | 127.9       | Ryukyuan    | 49   | 254   |
|                        | JP-ML    | Japan        | 35.7     | 139.8       | Japanese    | 71   |       |
|                        | JPT      | Japan        | 35.7     | 139.8       | Japanese    | 44   |       |
|                        | KR-KR    | Korea        | 36.9     | 127.5       | Korean      | 90   |       |
| Han                    | CHB      | China        | 40       | 116.4       | Han         | 45   | 206   |
|                        | CN-SH    | China        | 31.2     | 121.5       | Han         | 21   |       |
|                        | TW-HA    | Taiwan       | 25       | 121.5       | Han         | 48   |       |
|                        | TW-HB    | Taiwan       | 25       | 121.5       | Han         | 32   |       |
|                        | SG-CH    | Singapore    | 1.4      | 103.8       | Han         | 30   |       |
|                        | CN-GA    | China        | 23.3     | 113.5       | Han         | 30   |       |
| SouthernChinese &Thai1 | CN-HM    | China        | 26.3     | 108.7       | Hmong       | 26   | 65    |
|                        | TH-HM    | Thailand     | 18.6     | 98.1        | Hmong       | 20   |       |
|                        | TH-YA    | Thailand     | 20       | 100.2       | Yao         | 19   |       |
| SouthernChinese &Thai2 | CN-CC    | China        | 24.4     | 110.2       | Zhuang      | 26   | 329   |
|                        | CN-JI    | China        | 18.9     | 109.8       | Jiamao      | 31   |       |
|                        | TH-TL    | Thailand     | 19.2     | 100.9       | Tai Lue     | 20   |       |
|                        | TH-TY    | Thailand     | 18.4     | 98.9        | Tai Yong    | 18   |       |
|                        | TH-TK    | Thailand     | 18.6     | 98.9        | Tai Kern    | 18   |       |
|                        | TH-TU    | Thailand     | 19       | 99          | Tai Yuan    | 20   |       |
|                        | TH-MA    | Thailand     | 18.7     | 100.5       | Mlabri      | 18   |       |
|                        | TH-TN    | Thailand     | 19.1     | 100.9       | H'Tin       | 18   |       |
|                        | TH-PP    | Thailand     | 20.4     | 99.9        | Plang       | 18   |       |
|                        | CN-WA    | China        | 22.8     | 100.2       | Wa          | 56   |       |
|                        | TH-LW    | Thailand     | 18.4     | 98.1        | Lawa        | 19   |       |
|                        | TH-KA    | Thailand     | 18       | 98.4        | Karen       | 20   |       |
|                        | CN-JN    | China        | 22       | 101         | Jinuo       | 29   |       |
|                        | TH-PL    | Thailand     | 19.9     | 99.2        | Palong      | 18   |       |
| Indonesian             | AX-ME    | Pacific      | -5.8     | 155.1       | Melanesian  | 5    | 119   |
|                        | ID-AL    | Indonesia    | -8.3     | 124.7       | Alorese     | 19   |       |
|                        | ID-LE    | Indonesia    | -8.3     | 124.7       | Lembata     | 19   |       |
|                        | ID-LA    | Indonesia    | -8.3     | 123         | Lamaholot   | 20   |       |
|                        | ID-SO    | Indonesia    | -8.6     | 120.1       | Manggarai   | 19   |       |
|                        | ID-RA    | Indonesia    | -8.7     | 120.5       | Manggarai   | 17   |       |
|                        | ID-SB    | Indonesia    | -9.8     | 120         | Kambera     | 20   |       |
| PhilippineNegrito      | PI-AG    | Phillippines | 13.7     | 123.3       | Negrito     | 8    | 67    |
|                        | PI-AE    | Phillippines | 14.9     | 120.2       | Negrito     | 8    |       |
|                        | PI-MW    | Phillippines | 9.7      | 125.6       | Negrito     | 19   |       |
|                        | PI-IR    | Phillippines | 13       | 121.1       | Negrito     | 9    |       |
|                        | PI-AT    | Phillippines | 11.9     | 122         | Negrito     | 23   |       |
| SoutheastAsian         | AX-AM    | Taiwan       | 23.7     | 121.4       | Ami         | 10   | 261   |
|                        | AX-AT    | Taiwan       | 24.6     | 121.4       | Atayal      | 10   |       |
|                        | PI-UB    | Phillippines | 17.2     | 121.9       | Urban       | 20   |       |
|                        | PI-UN    | Phillippines | 14.6     | 121         | Urban       | 19   |       |
|                        | PI-UI    | Phillippines | 6.9      | 122.1       | Urban       | 20   |       |
|                        | PI-MA    | Phillippines | 8.2      | 125.9       | Manobo      | 18   |       |
|                        | ID-MT    | Indonesia    | -0.3     | 98.4        | Mentawai    | 15   |       |
|                        | ID-TR    | Indonesia    | -4.7     | 119.7       | Toraja      | 20   |       |
|                        | ID-ML    | Indonesia    | -3       | 104.7       | Malay       | 12   |       |
|                        | ID-KR    | Indonesia    | 1.5      | 100         | Batak Karo  | 17   |       |
|                        | ID-TB    | Indonesia    | 2.3      | 99.1        | Batak       | 20   |       |
|                        | ID-DY    | Indonesia    | 1.2      | 116.7       | Dayak       | 12   |       |
|                        | MY-MN    | Malaysia     | 2.8      | 102.2       | Malay       | 20   |       |
|                        | SG-MY    | Singapore    | 1.4      | 103.8       | Malay       | 30   |       |
| MY-KN                  | Malaysia | 5.3          | 102      | Malay       | 18          |      |       |
| MalaysianNegrito       | MY-JH    | Malaysia     | 5.4      | 101.1       | Negrito     | 50   | 80    |
|                        | MY-KS    | Malaysia     | 5.7      | 100.9       | Negrito     | 30   |       |
| Indian                 | IN-DR    | India        | 15.3     | 77.8        | Upper-caste | 24   | 132   |
|                        | IN-WI    | India        | 26.7     | 74          | Bhil        | 25   |       |
|                        | IN-EL    | India        | 23       | 88.2        | Upper-caste | 16   |       |
|                        | IN-SP    | India        | 29.1     | 76.5        | Upper-caste | 23   |       |
|                        | IN-WL    | India        | 19.7     | 75.9        | Upper-caste | 14   |       |
|                        | IN-NL    | India        | 26.8     | 81.4        | Upper-caste | 15   |       |
| IN-IL                  | India    | 26.7         | 74       | Upper-caste | 15          |      |       |
