# Supplementary material for: Genome-Wide Landscapes of Human Local Adaptation in Asia
Source: PLoS One. 2013 Jan 22;8(1):e54224. doi: 10.1371/journal.pone.0054224 (PMC3551950; doi:10.1371/journal.pone.0054224)
Supplement: Table S5 — Top 10 candidate genes in 36 comparing pairs. (XLS) [file pone.0054224.s007.xls]

## Sheet: Top10genes.txt
Table S5 Top 10 candidate genes in 36 comparing pairs
SouthernChinese&Thai1_SouthernChinese&Thai2
Gene	Chromosome	Strand	Start	End	No.SNP	Top SNP	Position	Alleles	Max Fst
GALNTL6	4	+	172734574	173961556	10	rs6811723	172778167	T/C	0.264777
BC035247	3	+	119813741	119855628	1	rs9289112	119818336	A/G	0.25341
PLXNA4	7	-	131808091	132333447	5	rs10488661	132190810	C/T	0.252943
surfactant	10	-	10826401	10836877	1	rs10508417	10833859	A/T	0.246603
TMEM232	5	-	109624933	110062381	2	rs9326798	109686527	G/A	0.232934
HLA-DRB6	6	-	32520489	32527779	2	rs2395182	32521295	G/T	0.230394
HLA-DRB5	6	-	32485162	32557562	2	rs2395182	32521295	G/T	0.230394
HLA-DRB1	6	-	32485162	32557562	2	rs2395182	32521295	G/T	0.230394
SCGN	6	+	25652428	25702006	1	rs3804126	25676560	G/A	0.224488
FRS2	12	+	69864128	69973561	2	rs4760790	69921061	A/G	0.214773
SouthernChinese&Thai1_Indian
Gene	Chromosome	Strand	Start	End	No.SNP	Top SNP	Position	Alleles	Max Fst
TTLL11	9	-	124584204	124855885	1	rs10513414	124645529	T/C	0.737643
ABCA12	2	-	215796266	216003151	2	rs1250233	216015348	G/A	0.720991
SLC24A3	20	+	19193289	19703540	4	rs6136651	19144096	G/A	0.71534
ERBB4	2	-	212240441	213403352	11	rs10497963	212773574	C/T	0.68727
CADPS	3	-	62384020	62861064	12	rs557125	62705261	T/C	0.683534
BC016484	14	+	96343152	96391899	2	rs2224442	96342135	T/G	0.652607
C6orf58	6	+	127898318	127912958	2	rs4294028	127859320	T/G	0.643437
C6orf174	6	-	127759551	127840500	2	rs4294028	127859320	T/G	0.643437
DYDC2	10	+	82104500	82127829	2	rs7898787	82146022	G/A	0.640768
DYDC1	10	-	82095863	82116511	2	rs7898787	82146022	G/A	0.640768
SouthernChinese&Thai1_Indonesian
Gene	Chromosome	Strand	Start	End	No.SNP	Top SNP	Position	Alleles	Max Fst
AMZ1	7	+	2719162	2755069	3	rs798527	2739316	T/C	0.577507
CUBN	10	-	16865965	17171816	3	rs7921129	17002994	C/T	0.477978
AKAP7	6	+	131456870	131604673	2	rs9321275	131534911	A/G	0.446686
STX7	6	-	132778662	132834337	2	rs9285472	132754000	C/T	0.427674
MOXD1	6	-	132617194	132722664	2	rs9285472	132754000	C/T	0.427674
C1orf112	1	+	169631244	169822227	2	rs4916375	169629465	T/C	0.419684
MTTP	4	+	100485239	100545153	3	rs2851292	100522524	G/T	0.415634
DAPP1	4	+	100737980	100791344	1	rs10516445	100743702	C/G	0.410591
YTHDC2	5	+	112849409	112930979	2	rs182988	112841465	T/A	0.398445
XPR1	1	+	180601145	180859413	3	rs516567	180845658	T/C	0.393946
SouthernChinese&Thai1_MalaysianNegrito
Gene	Chromosome	Strand	Start	End	No.SNP	Top SNP	Position	Alleles	Max Fst
AMZ1	7	+	2719162	2755069	3	rs798525	2742157	A/C	0.58419
RANBP3L	5	-	36249104	36302011	2	rs2133766	36314647	C/T	0.568184
RCHY1	4	-	76404354	76439628	1	rs7681167	76380246	A/G	0.543875
ARNIP	4	-	76404354	76439628	1	rs7681167	76380246	A/G	0.543875
DEFA4	8	-	6793344	6795786	4	rs2738079	6804222	C/A	0.540877
PLCG2	16	+	81812929	81991898	4	rs1424189	81888111	C/T	0.537573
STARD13	13	-	33677272	34250932	3	rs1337966	33749980	A/T	0.523563
RARS	5	+	167913462	167946307	1	rs292491	167951832	A/G	0.520066
FBLL1	5	+	167956581	167957638	1	rs292491	167951832	A/G	0.520066
SLC44A5	1	-	75667815	76143610	4	rs1146635	76024923	A/G	0.517577
SouthernChinese&Thai1_PhilippineNegrito
Gene	Chromosome	Strand	Start	End	No.SNP	Top SNP	Position	Alleles	Max Fst
FOXQ1	6	+	1312674	1314992	1	rs951318	1263711	A/G	0.976191
PIK3R3	1	-	46505812	46642160	1	rs10489769	46579290	A/G	0.967889
PMVK	1	-	154897208	154909484	1	rs951781	154908161	C/T	0.802113
AK055145	13	+	112762363	112764886	1	rs561241	112808035	T/C	0.793832
LRRFIP1	2	+	238536223	238690288	1	rs878133	238681672	G/A	0.758172
PRDM16	1	+	2985743	3355183	1	rs1112213	3127559	C/T	0.735051
AFAP1	4	-	7760439	7941653	3	rs4689160	7797720	C/T	0.649794
CAMTA1	1	+	6845383	7829763	3	rs6664987	7453925	C/T	0.625671
CDH13	16	+	82660577	83830197	4	rs4072154	83804696	C/T	0.613584
BC031239	9	-	129032402	129038194	2	rs1058266	129024929	G/A	0.598658
SouthernChinese&Thai1_SoutheastAsian
Gene	Chromosome	Strand	Start	End	No.SNP	Top SNP	Position	Alleles	Max Fst
DAPP1	4	+	100737980	100791344	1	rs10516445	100743702	C/G	0.46364
UNQ9427	4	-	100845482	100867879	1	rs10516451	100845572	A/G	0.408639
DNAJB14	4	-	100820711	100867879	1	rs10516451	100845572	A/G	0.408639
AL832378	4	-	100557689	100571614	1	rs1154460	100560666	G/A	0.370837
MTTP	4	+	100485239	100545153	3	rs2851292	100522524	G/T	0.34586
A2BP1	16	+	6069131	7763340	24	rs10500343	6982533	C/T	0.314604
KCNH8	3	+	19190016	19577135	2	rs10510487	19452540	C/T	0.30781
AMZ1	7	+	2719162	2755069	3	rs798525	2742157	A/C	0.290675
AK128161	8	-	93725189	93889865	3	rs9297912	93741652	T/C	0.273284
LOC390858	18	+	56702970	56720446	3	rs10503048	56747418	T/C	0.270439
SouthernChinese&Thai2_Indian
Gene	Chromosome	Strand	Start	End	No.SNP	Top SNP	Position	Alleles	Max Fst
MLKL	16	-	74705752	74734789	4	rs4888473	74719491	G/A	0.633114
ERBB4	2	-	212240441	213403352	10	rs10497965	212776825	A/G	0.586288
FCRL1	1	-	157764195	157789940	3	rs1562384	157829248	A/C	0.586214
DKFZp667D0116	1	-	157764195	157789940	3	rs1562384	157829248	A/C	0.586214
CD5L	1	-	157800705	157811634	1	rs1562384	157829248	A/C	0.586214
ABCA12	2	-	215796266	216003151	3	rs1250233	216015348	G/A	0.58134
NOX3	6	-	155716502	155777037	3	rs9322523	155783329	T/C	0.581326
BC016484	14	+	96343152	96391899	2	rs2224442	96342135	T/G	0.578382
SLC24A3	20	+	19193289	19703540	6	rs6136651	19144096	G/A	0.558154
DCLK1	13	-	36343122	36705464	6	rs10507446	36688007	G/A	0.555003
SouthernChinese&Thai2_Indonesian
Gene	Chromosome	Strand	Start	End	No.SNP	Top SNP	Position	Alleles	Max Fst
MTTP	4	+	100485239	100545153	3	rs2851292	100522524	G/T	0.461419
CUBN	10	-	16865965	17171816	3	rs7921129	17002994	C/T	0.440171
ELF1	13	-	41506055	41593508	3	rs943390	41534943	T/C	0.395522
RALGPS2	1	+	178694299	178889235	3	rs3845401	178830671	C/T	0.379936
ANGPTL1	1	-	178818670	178840215	2	rs3845401	178830671	C/T	0.379936
GTF2B	1	-	89318321	89357301	2	rs1329120	89357153	A/G	0.37949
NAP1L1	12	-	76438671	76478738	1	rs696452	76523221	C/T	0.378621
GBP5	1	-	89724635	89738544	6	rs1563786	89725145	G/T	0.365923
AK127472	6	-	126698800	127440994	3	rs972275	127433537	C/G	0.359763
GRIP1	12	-	66741223	67197894	7	rs2870951	66870812	A/G	0.351742
SouthernChinese&Thai2_MalaysianNegrito
Gene	Chromosome	Strand	Start	End	No.SNP	Top SNP	Position	Alleles	Max Fst
PPP1CC	12	-	111157614	111180757	1	rs11066232	111203549	C/T	0.491601
RANBP3L	5	-	36249104	36302011	2	rs2133766	36314647	C/T	0.488948
PKHD1	6	-	51480144	51952423	14	rs9296662	51783569	C/T	0.480792
FBW3	22	+	23604894	23607174	1	rs737769	23605393	T/C	0.479024
BCR-ABL	22	+	23595985	23627388	1	rs737769	23605393	T/C	0.479024
BCR	22	+	23522551	23660223	1	rs737769	23605393	T/C	0.479024
DEFA4	8	-	6793344	6795786	4	rs2738079	6804222	C/A	0.46715
NRXN3	14	+	78870092	80330758	18	rs9323673	79046853	C/G	0.461649
KIAA0743	14	+	78636927	80328821	20	rs9323673	79046853	C/G	0.461649
TCBA1	6	+	124125068	125146784	14	rs472059	124958704	A/G	0.447499
SouthernChinese&Thai2_PhilippineNegrito
Gene	Chromosome	Strand	Start	End	No.SNP	Top SNP	Position	Alleles	Max Fst
FOXQ1	6	+	1312674	1314992	1	rs951318	1263711	A/G	0.976892
PIK3R3	1	-	46505812	46642160	1	rs10489769	46579290	A/G	0.945883
AK055145	13	+	112762363	112764886	1	rs561241	112808035	T/C	0.855873
LRRFIP1	2	+	238536223	238690288	1	rs878133	238681672	G/A	0.77314
PMVK	1	-	154897208	154909484	1	rs951781	154908161	C/T	0.763266
PRDM16	1	+	2985743	3355183	1	rs1112213	3127559	C/T	0.672301
POLM	7	-	44111848	44122129	1	rs1558469	44112435	C/T	0.620558
Pol	7	-	44111848	44122129	1	rs1558469	44112435	C/T	0.620558
CAMTA1	1	+	6845383	7829763	2	rs6664987	7453925	C/T	0.602817
BC031239	9	-	129032402	129038194	2	rs1058266	129024929	G/A	0.595043
SouthernChinese&Thai2_SoutheastAsian
Gene	Chromosome	Strand	Start	End	No.SNP	Top SNP	Position	Alleles	Max Fst
MTTP	4	+	100485239	100545153	3	rs2851292	100522524	G/T	0.382911
AL832378	4	-	100557689	100571614	1	rs1154460	100560666	G/A	0.243746
DAPP1	4	+	100737980	100791344	1	rs10516445	100743702	C/G	0.23292
UNQ9427	4	-	100845482	100867879	2	rs10516451	100845572	A/G	0.207279
DNAJB14	4	-	100820711	100867879	2	rs10516451	100845572	A/G	0.207279
SYT7	11	-	61282787	61348298	2	rs1535	61354548	A/G	0.176106
BC040894	11	+	61355965	61375017	1	rs1535	61354548	A/G	0.176106
AK127472	6	-	126698800	127440994	5	rs1343224	127178098	G/C	0.172461
COL29A1	3	+	130064358	130203688	2	rs1680786	130127530	T/C	0.170933
C4orf37	4	-	98480033	99064391	4	rs1508460	98747765	C/G	0.16655
Han_SouthernChinese&Thai1
Gene	Chromosome	Strand	Start	End	No.SNP	Top SNP	Position	Alleles	Max Fst
C1orf140	1	-	221503269	221509638	1	rs851195	221499582	T/C	0.281242
ALDH7A1	5	-	125878917	125931082	1	rs10519913	125893742	T/C	0.265602
TMEM232	5	-	109624933	110062381	2	rs1488595	109932655	G/T	0.253067
STK32A	5	+	146614578	146764241	3	rs4705167	146723415	C/T	0.240867
C11orf41	11	+	33563876	33695644	2	rs10501127	33698233	C/G	0.239673
PLXNA4	7	-	131808091	132333447	7	rs10488213	132269295	A/G	0.231204
KCNH8	3	+	19190016	19577135	2	rs10510494	19589049	A/G	0.229901
RFTN1	3	-	16357352	16555222	5	rs2059743	16604325	A/T	0.226786
DAZL	3	-	16628302	16647006	4	rs2059743	16604325	A/T	0.226786
BC034913	3	+	16577826	16582880	4	rs2059743	16604325	A/T	0.226786
Han_SouthernChinese&Thai2
Gene	Chromosome	Strand	Start	End	No.SNP	Top SNP	Position	Alleles	Max Fst
VEGFC	4	-	177604690	177713895	6	rs921879	177670217	C/G	0.223048
C1orf140	1	-	221503269	221509638	1	rs851195	221499582	T/C	0.214587
ALDH7A1	5	-	125878917	125931082	2	rs10519913	125893742	T/C	0.214587
SLCO6A1	5	-	101707649	101834720	1	rs10515325	101841830	C/T	0.214161
HLA-DRB6	6	-	32520489	32527779	2	rs2395182	32521295	G/T	0.201945
HLA-DRB5	6	-	32485162	32557562	3	rs2395182	32521295	G/T	0.201945
HLA-DRB1	6	-	32485162	32557562	3	rs2395182	32521295	G/T	0.201945
PBX1	1	+	164528801	164854300	16	rs526625	164899582	C/T	0.181201
TCP11L2	12	+	106696580	106740790	1	rs10507218	106731363	C/T	0.155312
SLC16A7	12	+	59989847	60175407	2	rs10506426	60061759	A/C	0.144413
Han_Indian
Gene	Chromosome	Strand	Start	End	No.SNP	Top SNP	Position	Alleles	Max Fst
ABCA12	2	-	215796266	216003151	4	rs1250233	216015348	G/A	0.727644
DNAJC6	1	+	65720147	65881552	3	rs1343982	65817839	C/T	0.673028
SLC24A3	20	+	19193289	19703540	5	rs6136651	19144096	G/A	0.661476
BC016484	14	+	96343152	96391899	2	rs2224442	96342135	T/G	0.646633
BX647987	4	+	100010010	100222513	1	rs1230209	100186806	T/G	0.63474
BC038532	4	+	100175085	100196207	1	rs1230209	100186806	T/G	0.63474
NOX3	6	-	155716502	155777037	2	rs9322523	155783329	T/C	0.602788
MLKL	16	-	74705752	74734789	4	rs724247	74727028	T/A	0.594497
ERBB4	2	-	212240441	213403352	10	rs10497965	212776825	A/G	0.591086
CR623725	12	-	22477345	22589990	2	rs10505879	22539123	G/T	0.566642
Han_Indonesian
Gene	Chromosome	Strand	Start	End	No.SNP	Top SNP	Position	Alleles	Max Fst
FMO6P	1	+	171106878	171130702	4	rs7527462	171129003	C/G	0.496259
CUBN	10	-	16865965	17171816	4	rs7921129	17002994	C/T	0.440171
RALGPS2	1	+	178694299	178889235	3	rs3845400	178830467	G/A	0.398344
ANGPTL1	1	-	178818670	178840215	2	rs3845400	178830467	G/A	0.398344
C6orf173	6	+	126661252	126804465	1	rs10499135	126668026	A/G	0.383138
LRRC8B	1	+	89990396	90063418	1	rs519989	89995988	C/A	0.378801
C1orf112	1	+	169631244	169822227	2	rs4916375	169629465	T/C	0.375777
FMO2	1	+	171154387	171181822	2	rs2206363	171188027	T/C	0.372973
DKFZp667E137	1	+	171154387	171179856	2	rs2206363	171188027	T/C	0.372973
RGL1	1	+	183605207	183897665	5	rs1321996	183782084	A/G	0.365939
Han_MalaysianNegrito
Gene	Chromosome	Strand	Start	End	No.SNP	Top SNP	Position	Alleles	Max Fst
BC035398	10	+	91589266	91600618	3	rs1998643	91608972	A/G	0.531736
AL137595	10	+	91589266	91600618	3	rs1998643	91608972	A/G	0.531736
TGFBRAP1	2	-	105883541	105946148	1	rs10490698	105939602	A/G	0.517831
PGCP	8	+	97657498	98155721	5	rs2853255	98035721	A/G	0.516577
RGMB	5	+	98104998	98132196	2	rs1979980	98134967	A/C	0.511046
DEFA4	8	-	6793344	6795786	4	rs2738079	6804222	C/A	0.501406
POU2F1	1	+	167190142	167385342	9	rs726090	167236801	A/G	0.494898
CHD1	5	-	98190908	98262238	1	rs2662258	98153430	T/G	0.490282
BC042169	5	-	98105322	98108788	1	rs2662258	98153430	T/G	0.490282
AK093265	5	-	98105322	98108787	1	rs2662258	98153430	T/G	0.490282
Han_PhilippineNegrito
Gene	Chromosome	Strand	Start	End	No.SNP	Top SNP	Position	Alleles	Max Fst
FOXQ1	6	+	1312674	1314992	1	rs951318	1263711	A/G	0.976892
PIK3R3	1	-	46505812	46642160	1	rs10489769	46579290	A/G	0.957442
AK055145	13	+	112762363	112764886	1	rs561241	112808035	T/C	0.782986
LRRFIP1	2	+	238536223	238690288	1	rs878133	238681672	G/A	0.77314
POLM	7	-	44111848	44122129	1	rs1558469	44112435	C/T	0.720748
Pol	7	-	44111848	44122129	1	rs1558469	44112435	C/T	0.720748
PMVK	1	-	154897208	154909484	1	rs951781	154908161	C/T	0.719261
PRDM16	1	+	2985743	3355183	2	rs2455122	3178003	C/G	0.634078
CAMTA1	1	+	6845383	7829763	2	rs6664987	7453925	C/T	0.600601
NISCH	3	+	52489133	52527087	1	rs728408	52492246	G/A	0.545216
Han_SoutheastAsian
Gene	Chromosome	Strand	Start	End	No.SNP	Top SNP	Position	Alleles	Max Fst
DAPP1	4	+	100737980	100791344	1	rs10516445	100743702	C/G	0.35878
MTTP	4	+	100485239	100545153	3	rs2851292	100522524	G/T	0.338034
UNQ9427	4	-	100845482	100867879	2	rs10516451	100845572	A/G	0.308434
DNAJB14	4	-	100820711	100867879	2	rs10516451	100845572	A/G	0.308434
VEGFC	4	-	177604690	177713895	3	rs921879	177670217	C/G	0.232068
SLCO6A1	5	-	101707649	101834720	2	rs10515325	101841830	C/T	0.214161
C1orf140	1	-	221503269	221509638	1	rs851195	221499582	T/C	0.214161
ALDH7A1	5	-	125878917	125931082	1	rs10519913	125893742	T/C	0.214161
C4orf37	4	-	98480033	99064391	3	rs6814444	98660609	C/T	0.207113
AL832378	4	-	100557689	100571614	1	rs1154460	100560666	G/A	0.195665
Indonesian_Indian
Gene	Chromosome	Strand	Start	End	No.SNP	Top SNP	Position	Alleles	Max Fst
TTLL11	9	-	124584204	124855885	2	rs10513414	124645529	T/C	0.602286
BX647987	4	+	100010010	100222513	1	rs1230209	100186806	T/G	0.590787
BC038532	4	+	100175085	100196207	1	rs1230209	100186806	T/G	0.590787
ABCA12	2	-	215796266	216003151	3	rs1250233	216015348	G/A	0.590446
ERBB4	2	-	212240441	213403352	11	rs10497965	212776825	A/G	0.577887
EBF1	5	-	158122923	158526788	5	rs6894893	158375508	T/C	0.557806
PTPRD	9	-	8314246	10612723	31	rs2890897	9963935	C/G	0.554369
VWA3A	16	+	22103862	22168280	1	rs2113143	22132362	C/T	0.538617
PPID	4	-	159630279	159644552	2	rs1350027	159654891	G/A	0.522072
KIAA1450	4	+	159690181	159755440	2	rs1350027	159654891	G/A	0.522072
Indonesian_MalaysianNegrito
Gene	Chromosome	Strand	Start	End	No.SNP	Top SNP	Position	Alleles	Max Fst
AK096329	1	-	170429593	170489887	6	rs477289	170458017	A/C	0.520904
C20orf85	20	+	56725982	56736181	1	rs1073519	56737668	T/C	0.520351
CACNB4	2	-	152689287	152955593	3	rs10497097	152739115	G/A	0.520251
C1orf112	1	+	169631244	169822227	2	rs4916375	169629465	T/C	0.513341
EU233817	7	+	123672258	124035171	5	rs763434	123932235	A/G	0.508381
BC034434	18	-	51105993	51107426	2	rs10515971	51142216	C/A	0.502373
C11orf41	11	+	33563876	33695644	3	rs4755765	33599949	A/G	0.501891
WWOX	16	+	78133550	79246563	8	rs2210	79032118	C/T	0.488917
RCHY1	4	-	76404354	76439628	1	rs7681167	76380246	A/G	0.485737
ARNIP	4	-	76404354	76439628	1	rs7681167	76380246	A/G	0.485737
Indonesian_PhilippineNegrito
Gene	Chromosome	Strand	Start	End	No.SNP	Top SNP	Position	Alleles	Max Fst
FOXQ1	6	+	1312674	1314992	2	rs951318	1263711	A/G	0.976892
PIK3R3	1	-	46505812	46642160	1	rs10489769	46579290	A/G	0.92528
AK055145	13	+	112762363	112764886	1	rs561241	112808035	T/C	0.766626
LRRFIP1	2	+	238536223	238690288	1	rs878133	238681672	G/A	0.747346
PMVK	1	-	154897208	154909484	1	rs951781	154908161	C/T	0.686874
UNQ543	17	-	74620846	74639894	1	rs2707047	74635209	A/G	0.649412
ST6GALNAC1	17	-	74620846	74639894	1	rs2707047	74635209	A/G	0.649412
CAMTA1	1	+	6845383	7829763	4	rs6664987	7453925	C/T	0.605013
SLC39A7	6	+	33168602	33172213	4	rs3117222	33168927	C/T	0.582221
POLM	7	-	44111848	44122129	1	rs1558469	44112435	C/T	0.570109
Indonesian_SoutheastAsian
Gene	Chromosome	Strand	Start	End	No.SNP	Top SNP	Position	Alleles	Max Fst
YTHDC2	5	+	112849409	112930979	2	rs182988	112841465	T/A	0.322919
OR2S2	9	-	35957105	35958151	2	rs10491553	35931789	A/C	0.322543
LOC158376	9	+	35909479	35911617	2	rs10491553	35931789	A/C	0.322543
HRCT1	9	+	35906188	35907138	2	rs10491553	35931789	A/C	0.322543
ELF1	13	-	41506055	41593508	4	rs943390	41534943	T/C	0.322244
LRRC8B	1	+	89990396	90063418	1	rs519989	89995988	C/A	0.320659
RALGPS2	1	+	178694299	178889235	3	rs3845401	178830671	C/T	0.32021
ANGPTL1	1	-	178818670	178840215	2	rs3845401	178830671	C/T	0.32021
SAMD3	6	-	130465462	130686570	1	rs6569665	130575427	C/T	0.303335
C7orf58	7	+	120628750	120937497	1	rs7786203	120640843	G/A	0.293483
Japanese&Korean_SouthernChinese&Thai1
Gene	Chromosome	Strand	Start	End	No.SNP	Top SNP	Position	Alleles	Max Fst
A2BP1	16	+	6069131	7763340	40	rs10500343	6982533	C/T	0.36598
KCNV2	9	+	2717525	2729757	3	rs958505	2752721	A/C	0.294546
ZNF618	9	+	116638561	116818874	5	rs998410	116662495	G/T	0.290683
LOC144678	12	+	126927026	126957330	1	rs1406620	126992250	C/T	0.274374
P2RY14	3	-	150929904	150996230	1	rs951300	150938341	A/G	0.274254
MED12L	3	+	150803450	151151809	2	rs951300	150938341	A/G	0.274254
CD83	6	+	14117864	14137146	3	rs10484345	14178949	G/A	0.260546
CPNE4	3	-	131253583	132004254	5	rs7629719	131642624	G/T	0.256012
GRIN2B	12	-	13714409	14133022	17	rs2160734	13875616	C/T	0.255566
THSD7A	7	-	11414172	11871824	8	rs10499401	11774711	T/C	0.247976
Japanese&Korean_SouthernChinese&Thai2
Gene	Chromosome	Strand	Start	End	No.SNP	Top SNP	Position	Alleles	Max Fst
GRIP1	12	-	66741223	67197894	7	rs7132697	66819108	T/A	0.276355
AK094546	4	-	17484657	17487209	2	rs10489040	17437343	C/T	0.236686
ZNF618	9	+	116638561	116818874	3	rs998410	116662495	G/T	0.221874
LOC100302652	2	-	53897117	54087170	6	rs805401	53969507	C/T	0.213887
ASB3	2	-	53897117	54014079	5	rs805401	53969507	C/T	0.213887
AUTS2	7	+	69063904	70257884	7	rs1527590	69947822	C/T	0.212872
USP25	21	+	17102495	17252377	2	rs2223071	17141890	T/C	0.204537
BMP4	14	-	54416456	54423554	2	rs7142517	54376554	C/A	0.203788
OLFML2A	9	+	127539436	127577157	1	rs7040561	127568799	T/A	0.200101
VEGFC	4	-	177604690	177713895	6	rs921879	177670217	C/G	0.197422
Japanese&Korean_Han
Gene	Chromosome	Strand	Start	End	No.SNP	Top SNP	Position	Alleles	Max Fst
DIAPH3	13	-	60239724	60738119	8	rs300310	60360012	T/C	0.146948
BRMS1L	14	+	36295596	36341168	2	rs848080	36355107	T/C	0.138756
ZNF618	9	+	116638561	116818874	3	rs998410	116662495	G/T	0.132424
RNF144B	6	+	18387593	18468848	2	rs7757820	18443410	G/C	0.132403
ROR2	9	-	94325372	94712444	2	rs10491806	94324033	A/G	0.126426
SULT1C3	2	+	108863650	108881806	1	rs1073893	108855797	A/G	0.11793
PRKG1	10	+	52750944	54055274	30	rs10508970	53720173	A/G	0.112159
SIPA1L2	1	-	232533713	232651243	5	rs2089918	232699691	C/T	0.110662
C14orf106	14	-	45672393	45722605	2	rs2218098	45690730	G/A	0.104801
NAALADL2	3	+	174577110	175523426	31	rs6797547	175445415	T/A	0.104423
Japanese&Korean_Indian
Gene	Chromosome	Strand	Start	End	No.SNP	Top SNP	Position	Alleles	Max Fst
ABCA12	2	-	215796266	216003151	4	rs1250233	216015348	G/A	0.74333
SLC24A3	20	+	19193289	19703540	5	rs6136651	19144096	G/A	0.688252
NOX3	6	-	155716502	155777037	3	rs9322523	155783329	T/C	0.667624
BX647987	4	+	100010010	100222513	1	rs1230209	100186806	T/G	0.661411
BC038532	4	+	100175085	100196207	1	rs1230209	100186806	T/G	0.661411
ZC3H15	2	+	187350884	187374085	1	rs718259	187338791	G/C	0.604134
HDAC5	17	-	42154120	42201014	1	rs7224296	42155230	G/A	0.58984
C4orf11	4	-	83534266	83542590	1	rs2069080	83541615	T/C	0.580752
ZMYM6	1	-	35439959	35497569	2	rs10493067	35424550	G/A	0.56686
IRF2	4	-	185308877	185395726	3	rs13118044	185348235	C/G	0.566789
Japanese&Korean_Indonesian
Gene	Chromosome	Strand	Start	End	No.SNP	Top SNP	Position	Alleles	Max Fst
MTTP	4	+	100485239	100545153	3	rs10516441	100526190	G/A	0.508501
FMO6P	1	+	171106878	171130702	4	rs10489276	171129562	C/T	0.497705
HPS3	3	+	148847370	148891305	2	rs9289756	148830693	A/G	0.442562
HLTF	3	-	148747903	148804341	1	rs9289756	148830693	A/G	0.442562
DKFZp762O156	3	+	148877832	148891305	1	rs9289756	148830693	A/G	0.442562
CP	3	-	148880569	148939832	1	rs9289756	148830693	A/G	0.442562
SGCZ	8	-	13947373	15095792	21	rs1077592	15080323	G/C	0.430598
naaladase	11	+	89867817	89892505	2	rs570090	89877495	C/G	0.429186
NAALAD2	11	+	89867817	89925770	2	rs570090	89877495	C/G	0.429186
ELF1	13	-	41506055	41593508	4	rs943390	41534943	T/C	0.428838
Japanese&Korean_MalaysianNegrito
Gene	Chromosome	Strand	Start	End	No.SNP	Top SNP	Position	Alleles	Max Fst
WNT4	1	-	22443799	22470385	1	rs10489160	22445846	G/A	0.554821
PGCP	8	+	97657498	98155721	5	rs2853255	98035721	A/G	0.551132
BC035398	10	+	91589266	91600618	3	rs1998643	91608972	A/G	0.523935
AL137595	10	+	91589266	91600618	3	rs1998643	91608972	A/G	0.523935
PRINS	10	+	24536053	24544975	1	rs4074063	24542800	T/C	0.52168
KIAA1217	10	+	23983674	24836771	6	rs4074063	24542800	T/C	0.52168
STARD13	13	-	33677272	34250932	4	rs1337966	33749980	A/T	0.52099
KIAA0774	13	+	29598747	30080083	4	rs1412125	29939595	C/T	0.516056
BTBD16	10	+	124030820	124097676	1	rs3905303	124064881	A/G	0.509725
ZNF143	11	+	9482512	9550070	2	rs10500708	9571659	A/G	0.508143
Japanese&Korean_PhilippineNegrito
Gene	Chromosome	Strand	Start	End	No.SNP	Top SNP	Position	Alleles	Max Fst
FOXQ1	6	+	1312674	1314992	1	rs951318	1263711	A/G	0.976892
PIK3R3	1	-	46505812	46642160	1	rs10489769	46579290	A/G	0.967921
LRRFIP1	2	+	238536223	238690288	1	rs878133	238681672	G/A	0.770951
AK055145	13	+	112762363	112764886	1	rs561241	112808035	T/C	0.707086
POLM	7	-	44111848	44122129	1	rs1558469	44112435	C/T	0.671582
Pol	7	-	44111848	44122129	1	rs1558469	44112435	C/T	0.671582
BC031239	9	-	129032402	129038194	1	rs1058266	129024929	G/A	0.634226
PRDM16	1	+	2985743	3355183	2	rs2455122	3178003	C/G	0.634078
CAMTA1	1	+	6845383	7829763	5	rs6664987	7453925	C/T	0.618744
RPLP0L2	11	+	61382507	61406921	1	rs174449	61396955	G/A	0.60947
Japanese&Korean_SoutheastAsian
Gene	Chromosome	Strand	Start	End	No.SNP	Top SNP	Position	Alleles	Max Fst
MTTP	4	+	100485239	100545153	3	rs10516441	100526190	G/A	0.449286
SYT7	11	-	61282787	61348298	1	rs1535	61354548	A/G	0.416673
BC040894	11	+	61355965	61375017	1	rs1535	61354548	A/G	0.416673
UNQ9427	4	-	100845482	100867879	2	rs10516451	100845572	A/G	0.406285
DNAJB14	4	-	100820711	100867879	2	rs10516451	100845572	A/G	0.406285
DAPP1	4	+	100737980	100791344	1	rs10516445	100743702	C/G	0.371181
ZNF618	9	+	116638561	116818874	4	rs998410	116662495	G/T	0.317862
C4orf37	4	-	98480033	99064391	3	rs6814444	98660609	C/T	0.258859
HMCN1	1	+	185703682	186160085	4	rs723848	186163007	G/A	0.250131
DKFZp762L185	1	+	186097209	186160085	1	rs723848	186163007	G/A	0.250131
MalaysianNegrito_Indian
Gene	Chromosome	Strand	Start	End	No.SNP	Top SNP	Position	Alleles	Max Fst
CCDC104	2	+	55746739	55772216	3	rs782603	55703767	A/G	0.69017
ERBB4	2	-	212240441	213403352	12	rs10497965	212776825	A/G	0.670563
RFX3	9	-	3224648	3525983	3	rs3739462	3462698	C/T	0.656954
C2orf63	2	-	55399686	55459699	4	rs3791653	55453837	A/G	0.616263
TGFBRAP1	2	-	105883541	105946148	2	rs10490698	105939602	A/G	0.615953
PKP2	12	-	32943681	33049780	1	rs2133675	33086481	G/A	0.614645
BAI3	6	+	69345631	70099402	8	rs3823070	69850758	T/G	0.611324
ADRBK2	22	+	25960860	26125256	3	rs980078	26045760	C/T	0.609482
POU4F3	5	+	145718586	145720083	4	rs9325005	145722628	T/C	0.608586
OPN5	6	+	47749797	47794114	2	rs965323	47816390	G/A	0.602422
PhilippineNegrito_Indian
Gene	Chromosome	Strand	Start	End	No.SNP	Top SNP	Position	Alleles	Max Fst
FOXQ1	6	+	1312674	1314992	2	rs951318	1263711	A/G	0.896602
PIK3R3	1	-	46505812	46642160	1	rs10489769	46579290	A/G	0.806419
SLC39A7	6	+	33168602	33172213	3	rs3130190	33169668	T/C	0.671076
ACTRT2	1	+	2938045	2939465	1	rs10489588	2941694	G/A	0.66541
RXRB	6	-	33161365	33168630	1	rs9277463	33161285	C/T	0.631633
COL11A2	6	-	33130468	33160245	2	rs9277463	33161285	C/T	0.631633
SYT7	11	-	61282787	61348298	1	rs1535	61354548	A/G	0.631272
BC040894	11	+	61355965	61375017	1	rs1535	61354548	A/G	0.631272
pp9286	5	-	177635540	177659803	1	rs2913838	177638437	C/T	0.616782
MGC15875	5	-	177635540	177659803	1	rs2913838	177638437	C/T	0.616782
PhilippineNegrito_MalaysianNegrito
Gene	Chromosome	Strand	Start	End	No.SNP	Top SNP	Position	Alleles	Max Fst
FOXQ1	6	+	1312674	1314992	1	rs951318	1263711	A/G	0.97895
PIK3R3	1	-	46505812	46642160	1	rs10489769	46579290	A/G	0.943449
PMVK	1	-	154897208	154909484	1	rs951781	154908161	C/T	0.888671
AK055145	13	+	112762363	112764886	1	rs561241	112808035	T/C	0.818462
LRRFIP1	2	+	238536223	238690288	1	rs878133	238681672	G/A	0.798198
UNQ543	17	-	74620846	74639894	1	rs2707047	74635209	A/G	0.700624
ST6GALNAC1	17	-	74620846	74639894	1	rs2707047	74635209	A/G	0.700624
CDH13	16	+	82660577	83830197	4	rs4072154	83804696	C/T	0.670168
CAMTA1	1	+	6845383	7829763	3	rs6664987	7453925	C/T	0.646106
PRDM16	1	+	2985743	3355183	1	rs1112213	3127559	C/T	0.635734
PhilippineNegrito_SoutheastAsian
Gene	Chromosome	Strand	Start	End	No.SNP	Top SNP	Position	Alleles	Max Fst
FOXQ1	6	+	1312674	1314992	2	rs951318	1263711	A/G	0.919381
PIK3R3	1	-	46505812	46642160	1	rs10489769	46579290	A/G	0.832435
PMVK	1	-	154897208	154909484	1	rs951781	154908161	C/T	0.731545
AK055145	13	+	112762363	112764886	1	rs561241	112808035	T/C	0.707118
LRRFIP1	2	+	238536223	238690288	1	rs878133	238681672	G/A	0.658377
POLM	7	-	44111848	44122129	1	rs1558469	44112435	C/T	0.590897
Pol	7	-	44111848	44122129	1	rs1558469	44112435	C/T	0.590897
UNQ543	17	-	74620846	74639894	1	rs2707047	74635209	A/G	0.559657
ST6GALNAC1	17	-	74620846	74639894	1	rs2707047	74635209	A/G	0.559657
GCNT7	20	-	55066547	55100981	1	rs6513281	55098368	T/A	0.547079
SoutheastAsian_Indian
Gene	Chromosome	Strand	Start	End	No.SNP	Top SNP	Position	Alleles	Max Fst
BX647987	4	+	100010010	100222513	1	rs1230209	100186806	T/G	0.709608
BC038532	4	+	100175085	100196207	1	rs1230209	100186806	T/G	0.709608
ABCA12	2	-	215796266	216003151	4	rs1250233	216015348	G/A	0.586172
SYT7	11	-	61282787	61348298	1	rs1535	61354548	A/G	0.583615
BC040894	11	+	61355965	61375017	1	rs1535	61354548	A/G	0.583615
DKFZp434B1913	13	+	26043114	26595419	3	rs9319336	26522356	T/C	0.552331
ATP8A2	13	+	25946208	26595419	5	rs9319336	26522356	T/C	0.552331
GRIA1	5	+	152869174	153193428	13	rs1461227	153149787	A/T	0.549475
SLC24A3	20	+	19193289	19703540	6	rs6136651	19144096	G/A	0.53788
SUCNR1	3	+	151591436	151599650	2	rs4323025	151644212	G/A	0.516005
SoutheastAsian_MalaysianNegrito
Gene	Chromosome	Strand	Start	End	No.SNP	Top SNP	Position	Alleles	Max Fst
RGMB	5	+	98104998	98132196	2	rs1979980	98134967	A/C	0.479996
CSGALNACT2	10	+	43633933	43680747	3	rs1147898	43644496	T/A	0.461696
WWOX	16	+	78133550	79246563	10	rs10514498	79032019	G/C	0.458172
TLL1	4	+	166794409	167024993	4	rs2874792	166971683	C/A	0.45035
RANBP3L	5	-	36249104	36302011	1	rs2133766	36314647	C/T	0.443313
INPP4B	4	-	142949183	143767604	9	rs3775707	143553242	G/A	0.441254
PKHD1	6	-	51480144	51952423	13	rs1326588	51781898	A/G	0.438146
SUCNR1	3	+	151591436	151599650	2	rs9283603	151560657	C/T	0.436899
AADAC	3	+	151531860	151546277	1	rs9283603	151560657	C/T	0.436899
EDEM3	1	-	184659626	184724041	3	rs10489393	184721857	T/C	0.42476
